# Supplementary material
Source: PubMed Central journal article supplement (PMC5068546)
Supplement: JVI.01122-16_zjv999182079so1.pdf [file JVI.01122-16_zjv999182079so1.pdf]

1 **Supplemental Materials (Scherer et al.):**

2

3 Supplemental Movie 1 (to Figure 1D):

4 PK15-mNG-VP26 cells express functional mNG-VP26. A confluent layer of PK15-

5 mNG-VP26 cells was infected with PRV180 at 0.01 MOI and covered with 1%

6 methylcellulose to limit virus diffusion. After initial plaques were detectable, images

7 were taken every 5 min over 12 h. The cells depicted were infected approximately at the

8 beginning of the movie. The change of mNG-VP26 localization and clustering into

9 assemblons is clearly visible as infection progresses. Scale bar is 25  $\mu$ m, time stamp is

10 hours:minutes.

11

12

13 Supplemental Movie 2 (to Figure 3B):

14 Dual-color PRV180G movement during entry. SCG neuronal cells were grown in

15 modified Campenot chambers for over two weeks and infected with PRV180G in the N

16 compartment 1 - 2 h before being imaged in the M compartment. Representative 15sec

17 (280frame) movie of an entering dual-color capsid is shown. First frame is time

18 projection of green channel in greyscale. Scale bar is 5  $\mu$ m, time stamp is

19 seconds.milliseconds.

20

21

22 Supplemental Movie 3 (to Figure 3B):

23 Single-color PRV180G movement during egress. SCG neuronal cells were grown in  
24 modified Campenot chambers for over two weeks and infected with PRV180G in the N  
25 compartment 12 - 13 h before being imaged in the M compartment. Representative 15sec  
26 (280frame) movie of an entering dual-color capsid is shown. First frame is time  
27 projection of red channel in greyscale. Scale bar is 5  $\mu\text{m}$ , time stamp is  
28 seconds.milliseconds.  
29
